# Supplementary material for: A klotho gene single nucleotide polymorphism is associated with the onset of stroke and plasma klotho concentration
Source: publisher site journal article supplement (doi:10.18632/aging.101728), 2018-12-31
Supplement: Supplementary file [file aging-v11i1-101728-supplementary-material-SD1.pdf]

## SUPPLEMENTARY MATERIAL

**Supplementary Table 1. The characteristics of SONIC study.**

|                                 | All(n=417)      | AA(n=188)       | AT(n=189)       | TT(n=40)        | P value | AA+AT (n=58)    | P value |
|---------------------------------|-----------------|-----------------|-----------------|-----------------|---------|-----------------|---------|
| male, n(%)                      | 204(49.2)       | 85(45)          | 96(51)          | 23(59)          | p=0.23  | 181(48)         | p=0.20  |
| age, year                       | 70±1            | 70±1            | 70±1            | 70±1            | N/A     | 70±1            | N/A     |
| BMI, kg/m <sup>2</sup>          | 29.3±6.5        | 22.9±3.3        | 22.8±3.1        | 23.5±2.5        | p=0.44  | 22.8±3.2        | p=0.20  |
| systolic BP, mmHg               | 136±26          | 136±22          | 136±37          | 134±36          | p=0.89  | 136±25          | p=0.64  |
| diastolic BP, mmHg              | 78±15           | 79±13           | 78±16           | 76±20           | p=0.59  | 78±14           | p=0.40  |
| hypertension, n(%)              | 266(64)         | 121(65)         | 118(63)         | 27(68)          | p=0.86  | 239(64)         | p=0.65  |
| diabetes, n(%)                  | 65(16)          | 26(14)          | 30(16)          | 9(23)           | p=0.38  | 56(15)          | p=0.21  |
| dyslipidemia, n(%)              | 184(44)         | 92(49)          | 73(39)          | 19(48)          | p=0.11  | 165(44)         | p=0.68  |
| smoking, n(%)                   | 124(30)         | 51(28)          | 63(34)          | 10(26)          | p=0.36  | 114(31)         | p=0.54  |
| drinking, n(%)                  | 142(35)         | 66(36)          | 65(35)          | 11(28)          | p=0.52  | 131(36)         | p=0.44  |
| Treatment of hypertension, n(%) | 149(72)         | 60(65)          | 77(78)          | 12(80)          | p=0.12  | 137(72)         | p=0.49  |
| past history of CVD             | 9(4)            | 5(5)            | 3(3)            | 1(3)            | p=0.72  | 8(4)            | p=0.88  |
| mean IMT, mm(IQR)               | 0.76(0.68-0.88) | 0.75(0.68-0.88) | 0.78(0.70-0.88) | 0.80(0.73-0.85) | p=0.41  | 0.75(0.68-0.88) | p=0.44  |

BMI, body mass index; BP, blood pressure; CVD, chronic vascular disease; IMT, intima-media thickness; IQR, interquartile range;

\*The significance of differences among three genotypes was determined by ANOVA or Kruskal-Wallis test for continuous variables and chi-square analysis or Fisher's exact test for categorical variables.
